# Supplementary material for: RNA m6 A modification enzymes shape innate responses to DNA by regulating interferon β
Source: PubMed Central journal article supplement — Genes Dev. 2018 Dec 1;32(23-24):1472–84. doi: 10.1101/gad.319475.118 (PMC6295168; doi:10.1101/gad.319475.118), 2018-12-01
Supplement: supp_gad.319475.118_Supplemental_Material.pdf [file supp_gad.319475.118_Supplemental_Material.pdf]

**RNA m<sup>6</sup>A modification enzymes shape innate responses to DNA  
by regulating interferon  $\beta$**

Rosa M. Rubio, Daniel P. Depledge Christopher Bianco, Letitia Thompson,  
and Ian Mohr

**List of Supplemental Material**

Supplemental Materials & Methods

Supplementary References

Tables S1-S4

Figures S1 - S10

## SUPPLEMENTAL MATERIALS & METHODS

**Immunoblotting and antibodies.** Total cellular protein was collected by lysis in sample buffer (62.5 mM Tris-HCl pH 6.8, 2% SDS, 10% glycerol, 0.7M  $\beta$ -mercaptoethanol) followed by boiling for 3 min. Lysates were fractionated by SDS-PAGE and analyzed by immunoblotting using the following antibodies: anti-ALKBH5 (*Sigma SAB1407587*), anti-FTO (*Abcam ab124892*), mouse anti-m<sup>6</sup>A monoclonal (*Synaptic Systems 202111*), rabbit anti-m<sup>6</sup>A polyclonal (*Synaptic Systems 202003*), anti-METTL14 (*Sigma HPA038002*), anti-METTL3 (*Proteintech 15073-1-AP*), anti-WTAP (*Proteintech 60188-1-Ig*), anti-YTHDF1 (*Proteintech 17479-1-AP*), anti-YTHDF2 (*Proteintech 24744-1-AP*), anti-YTHDF3 (*Proteintech 25537-1-AP*), anti-YTHDC1 (*Abcam ab122340*), anti-STAT1 (*Cell Signaling 9172*), anti-STAT1 Y701 (*Cell Signaling 7649*), anti-MDA5 (*Proteintech 21775-1-AP*), anti-pTBK1 S172 (*Cell Signaling 5483*), anti-TBK1 (*Cell Signaling 3504*), anti-pIRF3 S396 (*Cell Signaling 4947*), anti-IRF3 (*Proteintech 11312-1-AP*), anti-IkBa (*Proteintech 10268-1-AP*), anti-4E-BP1 (*Bethyl Laboratories A300-501A*), anti-actin (*Cell Signaling 3700*), anti-actin (*Cell Signaling 3700*), anti-GAPDH (*Cell Signaling 2118*); anti-pp28 (*Virusys CA004-100*), anti-UL44 (*Virusys CA006*), and anti-IE1/IE2 (*Millipore MAB810*). Primary antibodies were detected using either anti-mouse IgG HRP (*GE Healthcare NA931V*) or anti-rabbit IgG HRP (*GE Healthcare NA934V*) secondary antibodies and visualized by chemiluminescent detection.

**RNA interference.** siRNAs (20 nM) were transfected using RNAimax (*Invitrogen 13778075*) according to the manufacturer's instructions. METTL3-specific siRNA [5'-CUGCAAGUAUGUUCACUAUGA-3', *Liu et al., 2014*] was synthesized by Sigma.

The following siRNAs were purchased from Sigma: METTL14 (SASI\_Hs01\_00179440), ALKBH5 (SASI\_Hs01\_00013942), FTO (SASI\_Hs02\_00314786), YTHDF1 (SASI\_Hs01\_00233688), YTHDF2 (SASI\_Hs01\_00133214), YTHDF3 (SASI\_Hs01\_00202277), STING (SASI\_Hs02\_00371843); AllStars negative-control siRNA was purchased from Qiagen.

**Real-time PCR.** Total RNA was extracted using TRIzol (*Invitrogen*) according to manufacturer's instructions. cDNA was prepared using qScript XLT cDNA SuperMix (*Quantabio 84358*). Quantitative real-time PCR (qRT-PCR) was performed using SsoAdvanced Universal SYBR Green Supermix (*Bio-Rad 172-5274*) in a Bio-Rad C1000 Touch Thermal Cycler with the following primers:

| mRNA    | Forward                     | Reverse                      |
|---------|-----------------------------|------------------------------|
| IFNB1   | 5'-GAAAGAAGATTTACACCAGGG-3' | 5'-CCTTCAGGTAATGCAGAATC-3'   |
| GAPDH   | 5'-TCTTTTGCGTCGCCAGCCGA-3'  | 5'-ACCAGGCGCCCAATACGACC-3'   |
| DICER1  | 5'-AAATGGGAAATGTGATCCAG-3'  | 5'-AGTATACCTGTCTAAGACCAC-3'  |
| METTL3  | 5'-CGGGTAGATGAAATTTGGG-3'   | 5'-GATTTCTTTGACACCAACC-3'    |
| METTL14 | 5'-ACTAGAAATGCAACAGGATG-3'  | 5'-GATTTAAGCTCTGTGTTCCC-3'   |
| ALKBH5  | 5'-CGGCGAAGGCTACACTTACG-3'  | 5'-CCACCAGCTTTTGGATCACCA-3'  |
| YTHDF1  | 5'-CCAGAGAACAAAAGGACAAG-3'  | 5'-TTTGACTGTCCAGTAAGGTAG-3'  |
| YTHDF2  | 5'-CCAAGAGGAAGAAGAAAGTG-3'  | 5'-AGTCCTAATTCTCTTGAAGGTC-3' |
| YTHDF3  | 5'-ATCAGAGTAACAGCTATCCAC-3' | 5'-CCCAGTTGACTAAATACAC-3'    |
| YTHDC1  | 5'-AAGAGAGCTAGAGGCATATC-3'  | 5'-ATGCTTCTTTTCTGAACCTG-3'   |
| PPIA    | 5'-CCCACCGTGTTCTTCGACAT-3'  | 5'-TCTTTGGGACCTTGTCTGCAA-3'  |

**Type I interferon (IFN) Bioassay.** Type I IFN was quantified using the reporter cell line HEK-Blue™ IFN- $\alpha/\beta$  (*InvivoGen, hkb-ifnab*) according to the manufacturer's protocol. Briefly, HEK-Blue IFN-  $\alpha/\beta$  cells in 180 $\mu$ L media were incubated with 20  $\mu$ L NHDF cell culture supernatant at 37° C and 5% CO<sub>2</sub> for 24 hours. Secreted alkaline phosphatase (SEAP) activity was detected by incubating 20  $\mu$ L HEK-Blue IFN-  $\alpha/\beta$  supernatant with 180  $\mu$ L QUANTI-Blue™ (*InvivoGen, rep-qb1*) alkaline phosphatase substrate at 37°C and 5% CO<sub>2</sub> for 15 min. SEAP activity was quantified by measuring the optical density at 640nm in a SpectraMax M3 plate reader and converted to IFN units using a standard curve generated by quantifying SEAP activity in the supernatant of HEK-Blue IFN-  $\alpha/\beta$  cells incubated with recombinant IFN $\beta$  protein (*PBL Assay Science, 11415-1*)

**Indirect Immunofluorescence.** NHDFs grown on coverslips were fixed with 4% formaldehyde for 15 min, permeabilized with 0.5% TritonX-100 in PBS for 10 min and then blocked with 4% FBS. Immunostaining was performed using the appropriate primary and secondary antibodies. DNA was stained with 4',6'-diamidino-2-phenylindole (DAPI). Images were captured using a Leica DM5000 microscope equipped with Leica Imaging Software.

**Analysis of m<sup>6</sup>A RNA sequencing.** Following demultiplexing, sequence reads were deduplicated using BBtools (*bbduk.sh*) after which sequencing adapters were removed and low quality ends trimmed using TrimGalore (<https://github.com/FelixKrueger/TrimGalore>) [`trim_galore --length 25 infile --clip_R1 5`]. Sequence reads were subsequently mapped to hg19 using bowtie2 (*Langmead &*

Salzberg, 2012) and parsed using SAMTools (Li et al., 20019) to yield sorted, indexed BAM files. m<sup>6</sup>A-peak regions were subsequently identified using exomePeak (Meng et al., 2014) and visualized using IGV (Robinson et al., 2011) and GVIZ (Hahne & Ivanek, 2016).

#### SUPPLEMENTARY REFERENCES

Hahne F, Ivanek R. 2016. Visualizing Genomic Data Using Gviz and Bioconductor. *Methods Mol Biol.* **1418**: 335-351.

Langmead B, Salzberg SL. 2012. Fast gapped-read alignment with Bowtie 2. *Nat Methods.* **9**: 357-359.

Li H, Handsaker B, Wysoker A, Fennell T, Ruan J, Homer N, Marth G, Abecasis G, Durbin R; 1000 Genome Project Data Processing Subgroup. 2009. The Sequence Alignment/Map format and SAMtools. *Bioinformatics.* **25**: 2078-2079.

Liu J, Yue Y, Han D, Wang X, Fu Y, Zhang L, Jia G, Yu M, Lu Z, Deng X, Dai Q, Chen W, He C. (2014). A METTL3–METTL14 complex mediates mammalian nuclear RNA N<sup>6</sup>-adenosine methylation. *Nat. Chem. Biol.* **10**: 93-95.

Meng J, Cui X, Rao MK, Chen Y, Huang Y. 2013. Exome-based analysis for RNA epigenome sequencing data. *Bioinformatics.* **29**:1565-1567.

Meng J, Lu Z, Liu H, Zhang L, Zhang S, Chen Y, Rao MK, Huang Y. 2014. A protocol for RNA methylation differential analysis with MeRIP-Seq data and exomePeak R/Bioconductor package. *Methods.* **69**: 274-281.

Robinson JT, Thorvaldsdóttir H, Winckler W, Guttman M, Lander ES, Getz G, Mesirov JP. 2011. Integrative genomics viewer. *Nat Biotechnol.* **29**: 24-26.

**Supplementary Table S1: m<sup>6</sup>A peak regions (ExomePeak output) identified in buffer-treated and dsDNA-treated samples.**

**Supplementary Table S2: Genes commonly regulated by METTL14 and ALKBH5 depletion.**

**Supplementary Table S3: Sequencing metrics and sequence read archive (SRA) accessions.**

**Supplementary Table S4: m<sup>6</sup>A sequencing metrics and sequence read archive (SRA) accessions.**

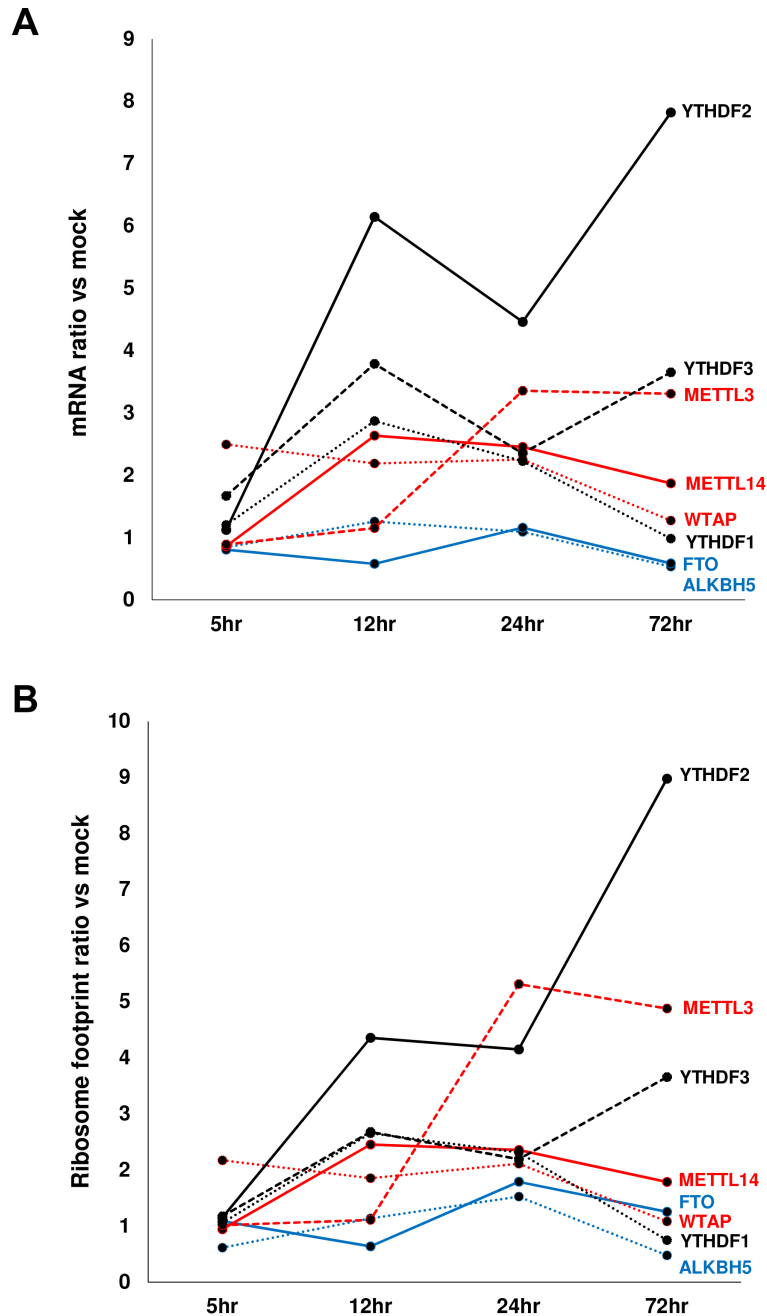

**Figure S1.** mRNA abundance and ribosome footprints of m<sup>6</sup>A readers, writers, and erasers. (A) Abundance of selected mRNAs, relative to mock treatment, as profiled during a 72 hr HCMV infection. (B) Ribosome footprint profiling of the same mRNAs. All data were extracted from Tirosh et al., 2015, Supplementary Table S1.

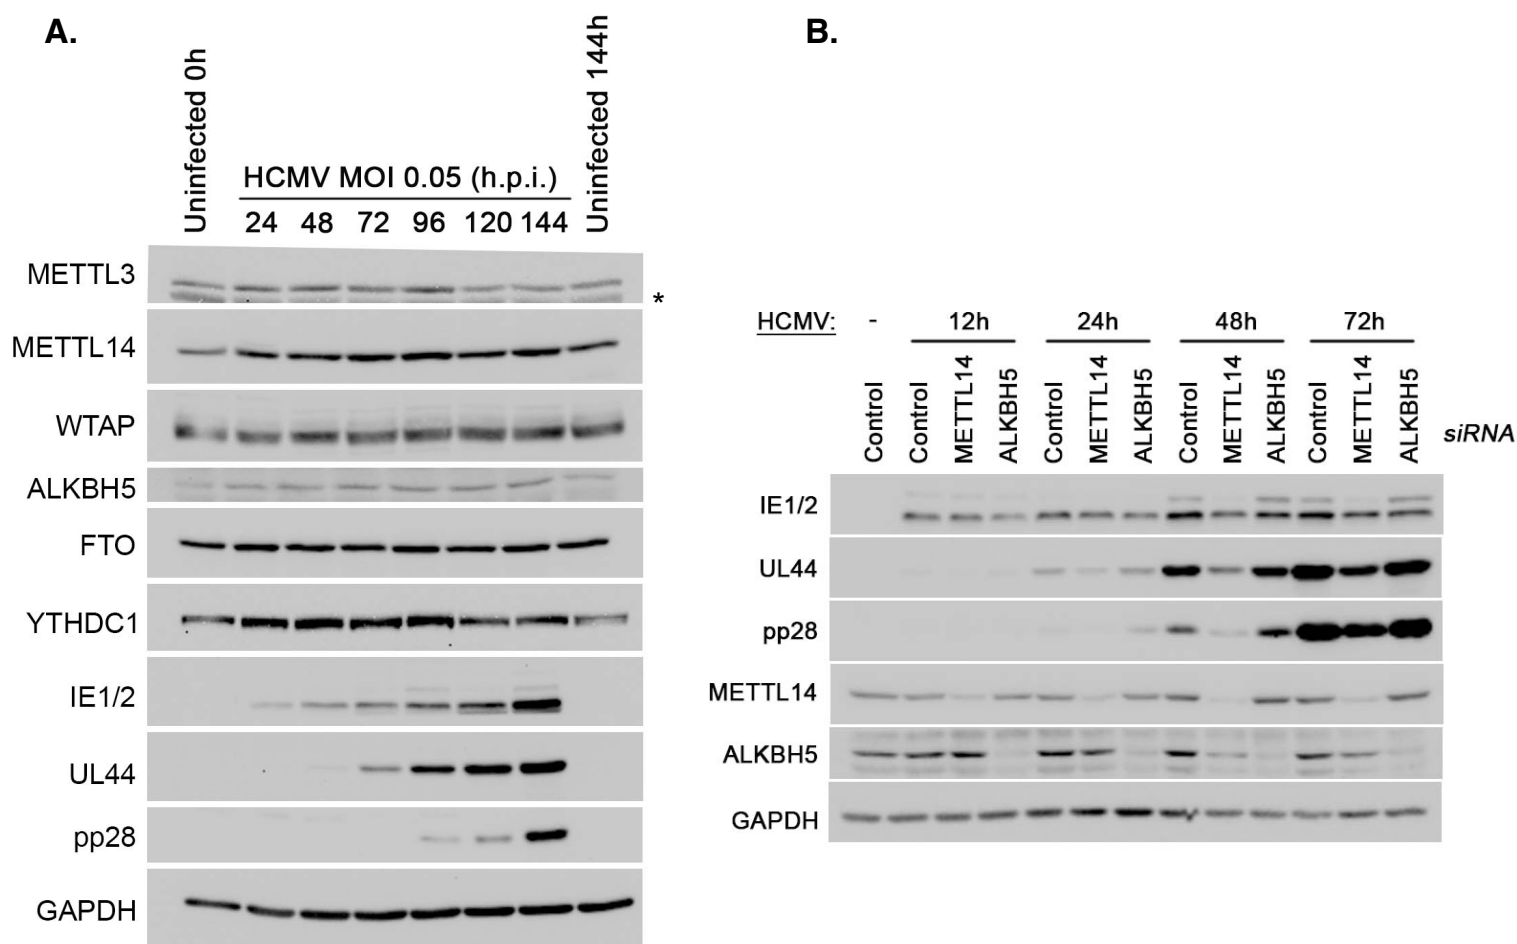

**Figure S2. Cellular m<sup>6</sup>A machinery responds to HCMV infection and regulates virus gene expression.** A) NHDFs were mock-infected (uninfected) or infected with HCMV (MOI=0.05). At the indicated hours post-infection (hpi), total protein was collected, fractionated by SDS-PAGE and analyzed by immunoblotting with the indicated antibodies. GAPDH represents a host antigen whose levels remain unchanged during infection. B) NHDFs were treated with control, non-silencing siRNA, siRNA specific for the m<sup>6</sup>A methyltransferase METTL14 subunit, or siRNA specific for the ALKBH5 demethylase. After 72h, cultures were infected with HCMV (MOI=3). At the indicated h post-infection, total protein was isolated, fractionated by SDS-PAGE and analyzed by immunoblotting with the indicated antisera.

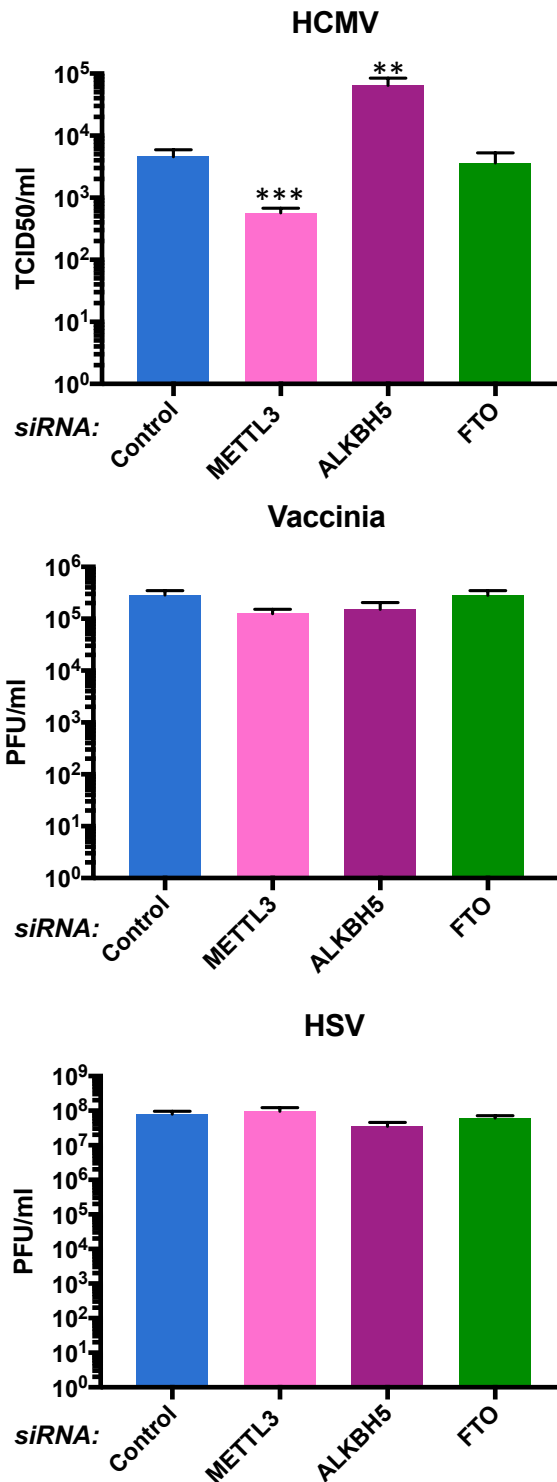

**Figure S3. Interfering with the host METTL3 m<sup>6</sup>A methylase and ALKBH5 demethylase selectively impacts HCMV, but not HSV1 or Vaccinia productive growth.** NHDFs were treated with control, non-silencing siRNA, siRNA specific for the m<sup>6</sup>A methyltransferase METTL3 subunits, or siRNA specific for the ALKBH5 or FTO demethylase. After 72 h, cultures were infected with HCMV (MOI=0.05), HSV-1 (MOI=5x10<sup>-4</sup>), or Vaccinia virus (MOI=5x10<sup>-4</sup>). Supernatants were harvested after 7 d for HCMV, 72 h for HSV-1 and 48 h for Vaccinia virus and virus titer (TCID/50) determined using NHDFs for HCMV or by plaque assay in Vero cells for HSV-1 and Vaccinia. The error bars indicate SEM. \*\*,  $P \leq 0.01$ ; \*\*\*,  $P \leq 0.001$ , by Student's *t* test.



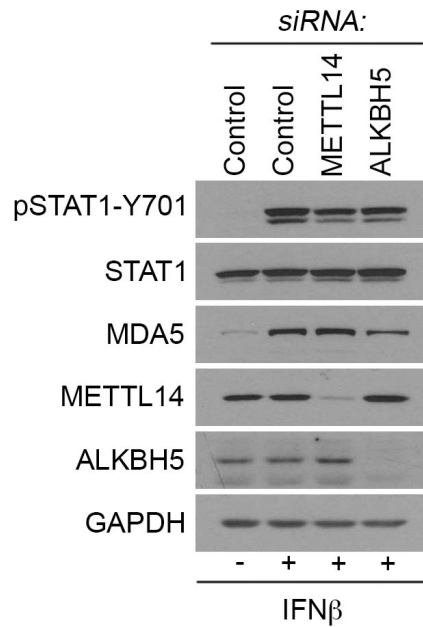

**Figure S4. METTL14 or ALKBH5-depletion does not detectably impact STAT1 phosphorylation in response to IFN $\beta$ .** NHDFs transfected with control, non-silencing siRNA or siRNA specific for METTL14 or ALKBH5 were untreated or treated with 100 U IFN $\beta$ . After 4h, total protein was collected, fractionated by SDS-PAGE and analyzed by immunoblotting using the indicated anti-sera.

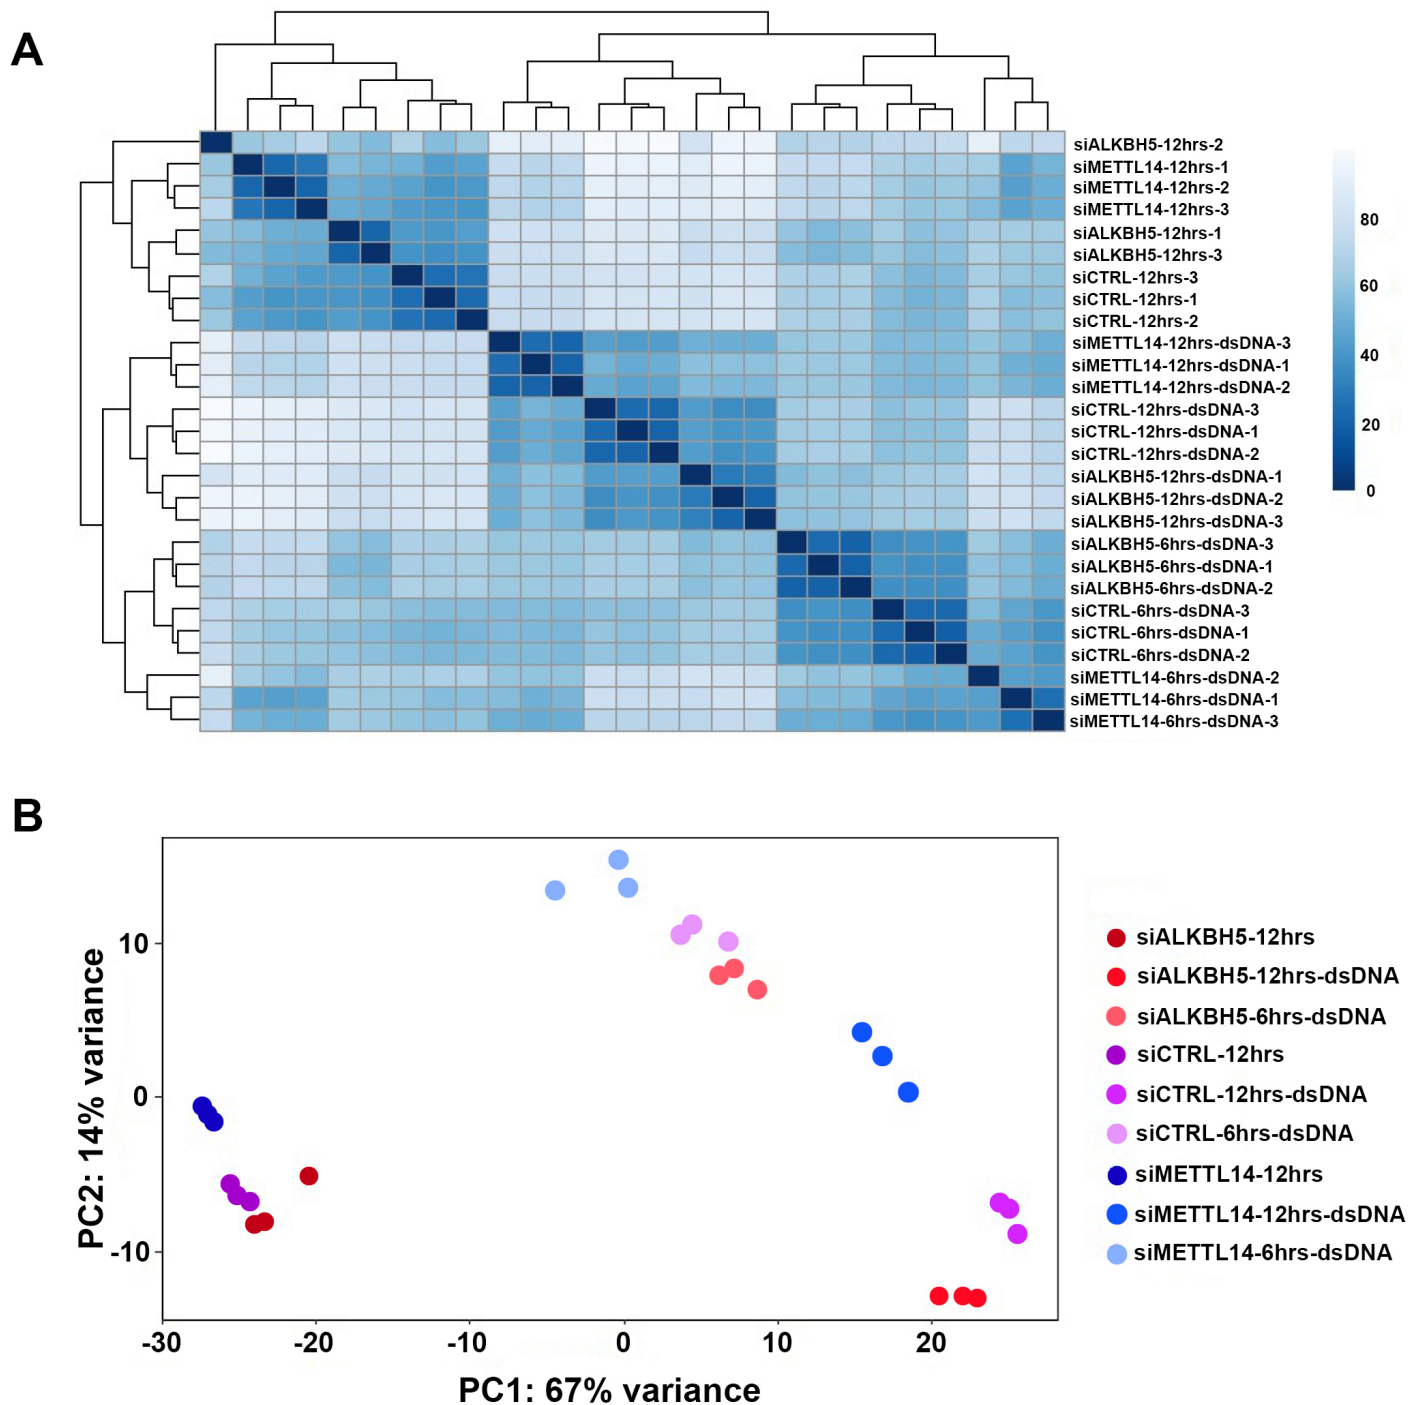

**Figure S5. Assessment of sequencing quality.** **a**, heatmap of sample-to-sample distances comparing all twenty-seven samples sequenced in this study. Sample siALKBH5-12hrs was excluded from further analyses due to aberrant clustering. **b**, principal component analysis (PCA) plot showing the same dataset organized according the principal components 1 and 2.

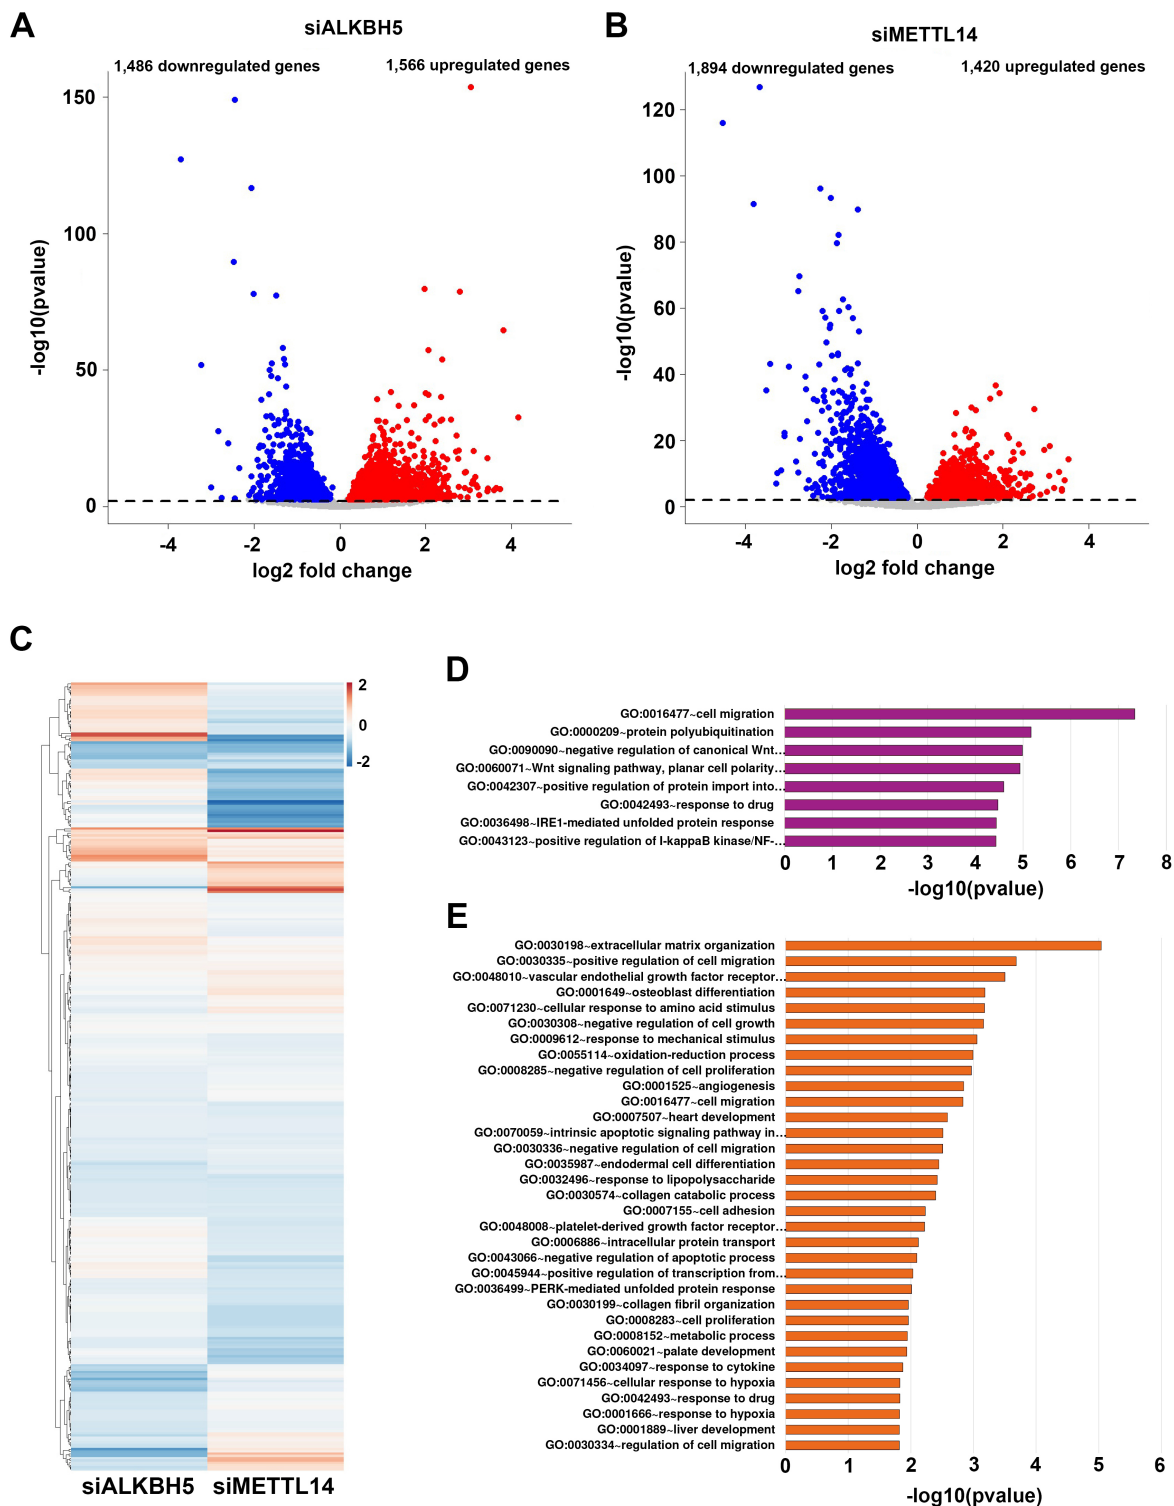

**Figure S6. Control of genome-wide responses to dsDNA by m<sup>6</sup>A demethylase ALKBH5 and m<sup>6</sup>A methylase subunit METTL14.** Volcano plots show differentially expressed genes (adjusted p value < 0.01) identified from RNA-Seq of polyadenylated RNA, collected from cells transfected with (a) siALKBH5 (n=3 biological replicates), or (b) siMETTL14 (n=2 biological replicates), and stimulated with dsDNA for 6 h. Genes upregulated versus an non-silencing siRNA control (stimulated with dsDNA for 6 h, n=3 biological replicates) are shown in red, while downregulated genes are shown in blue. Non-regulated genes are shown in grey. (c) Heatmap depicting 349 interferon-stimulated genes (ISGs), colored according to log<sub>2</sub>fold change in expression versus the non-silencing siRNA control. (d-e) Pathway analyses (GO direct terms) of significantly differentially expressed genes from (a) and (b) were conducted using DAVID and filtered according to a Benjamini-Hochberg procedure (< 0.05).

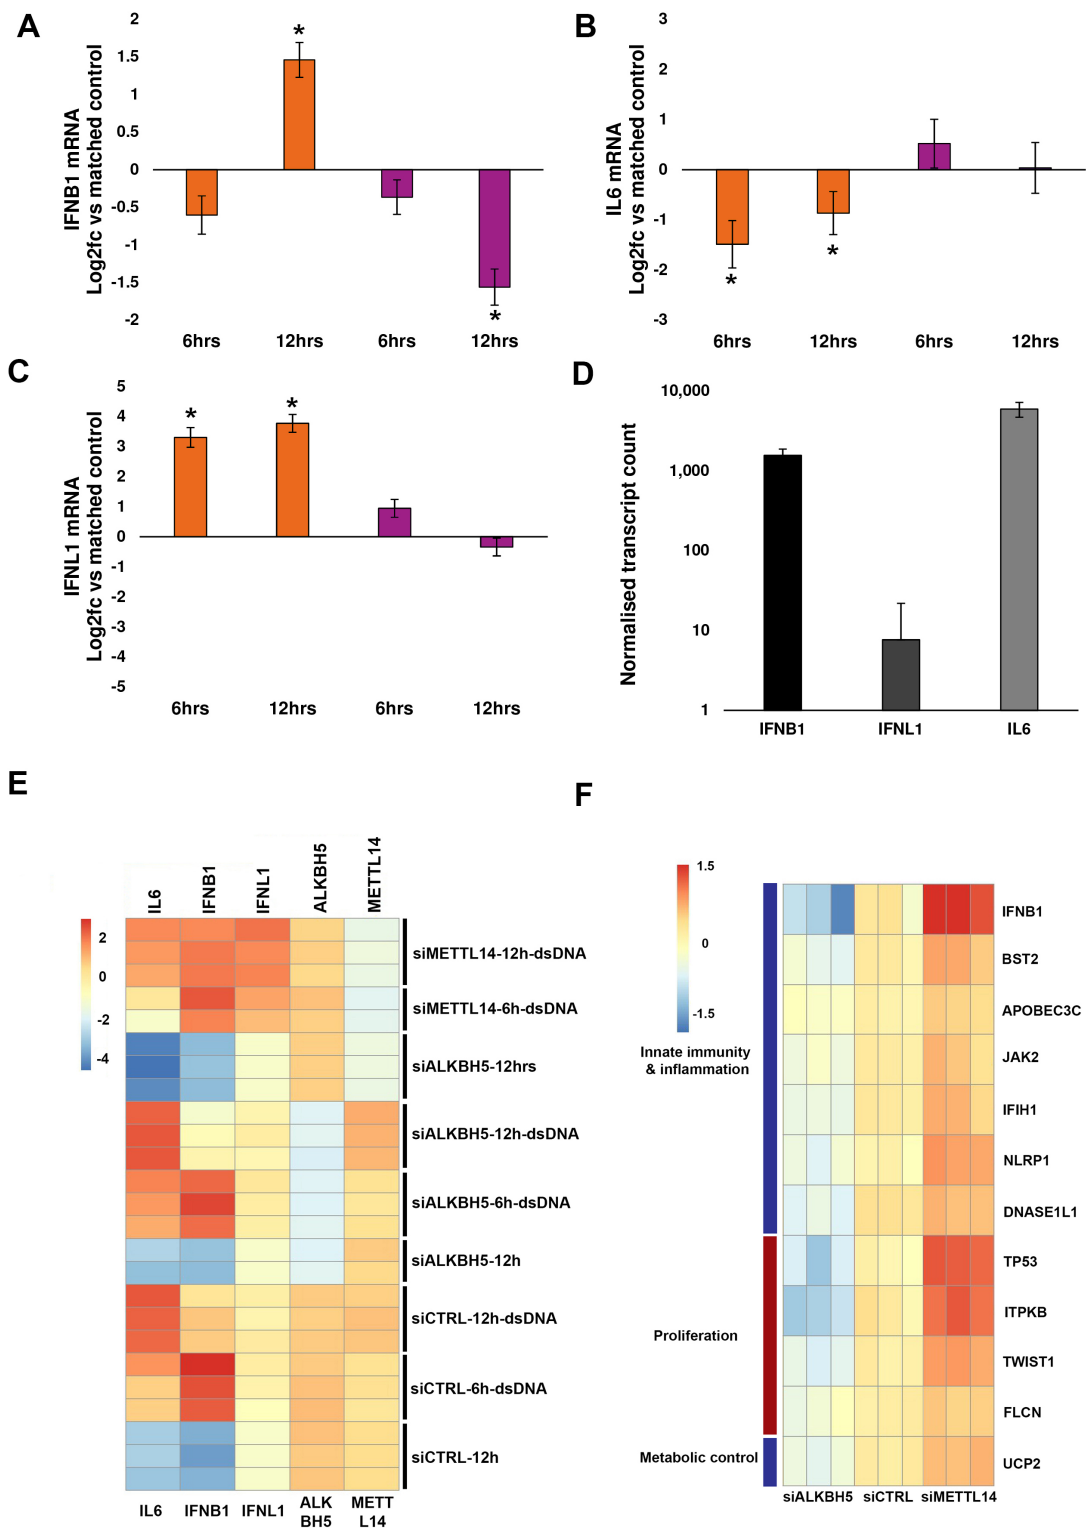

**Figure S7. Profiling of regulated interferons and siRNA targets** Following stimulation with dsDNA, increased cellular transcription of **A**, IFNB1, **B**, IL-6, and **C**, IFNL1 is variably modulated by siRNA-mediated suppression of METTL14 (orange) and ALKBH5 (purple) relative to siRNA controls at 6 and 12 hrs post-stimulation. Statistically significant differences log<sub>2</sub> fold changes (adjusted p value < 0.05) are highlighted by asterisks (\*). Error bars represent the log<sub>2</sub> standard error. **D**, median normalized transcripts counts (mRNA abundance) for IFNB1, IFNL1, and IL6. Error bars indicated the standard error. **E**, heatmap showing relative expression of the three regulated interferons and two siRNA targets. **F**, heatmap showing relative expression of genes upregulated by METTL14-depletion and downregulated by ALKBH5-depletion.

**A.**

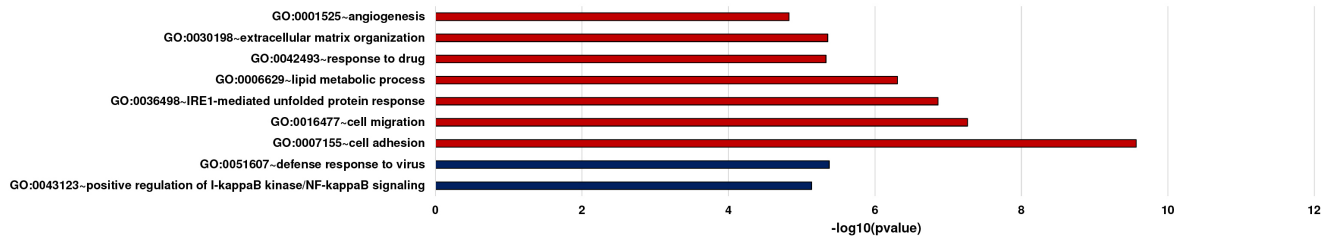

**B.**

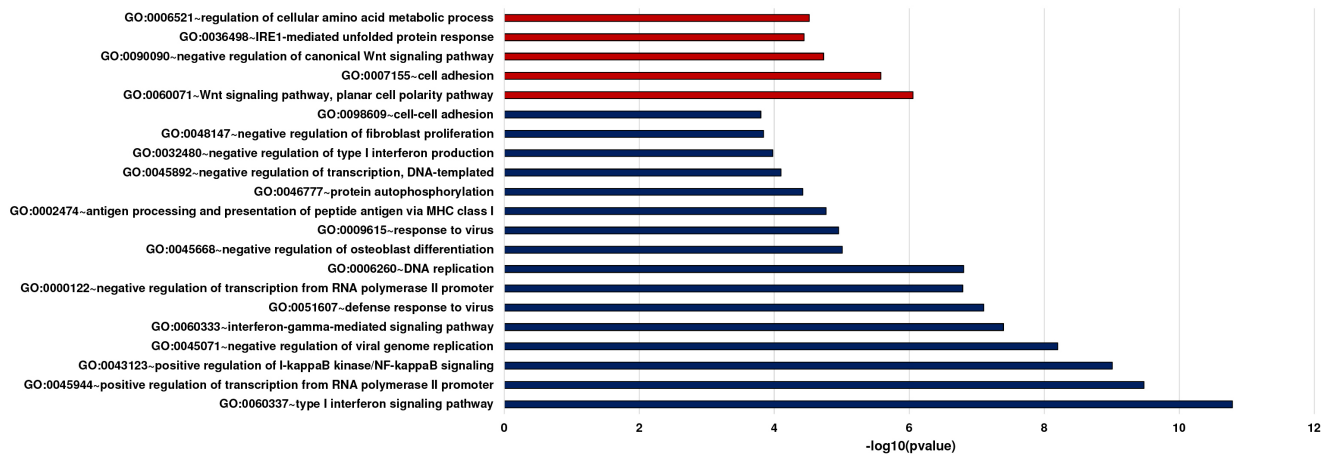

**Figure S8. Pathway analysis of differentially expressed genes in siALKBH5-treated cells A) after a 6 or 12 (B) hrs post dsDNA stimulation.** Enriched pathways (GO direct terms) were identified via David (REF) using all significantly upregulated (red) or downregulated (blue) gene sets. Only pathways with a Benjamini-Hochberg score < 0.05 are shown.

A.

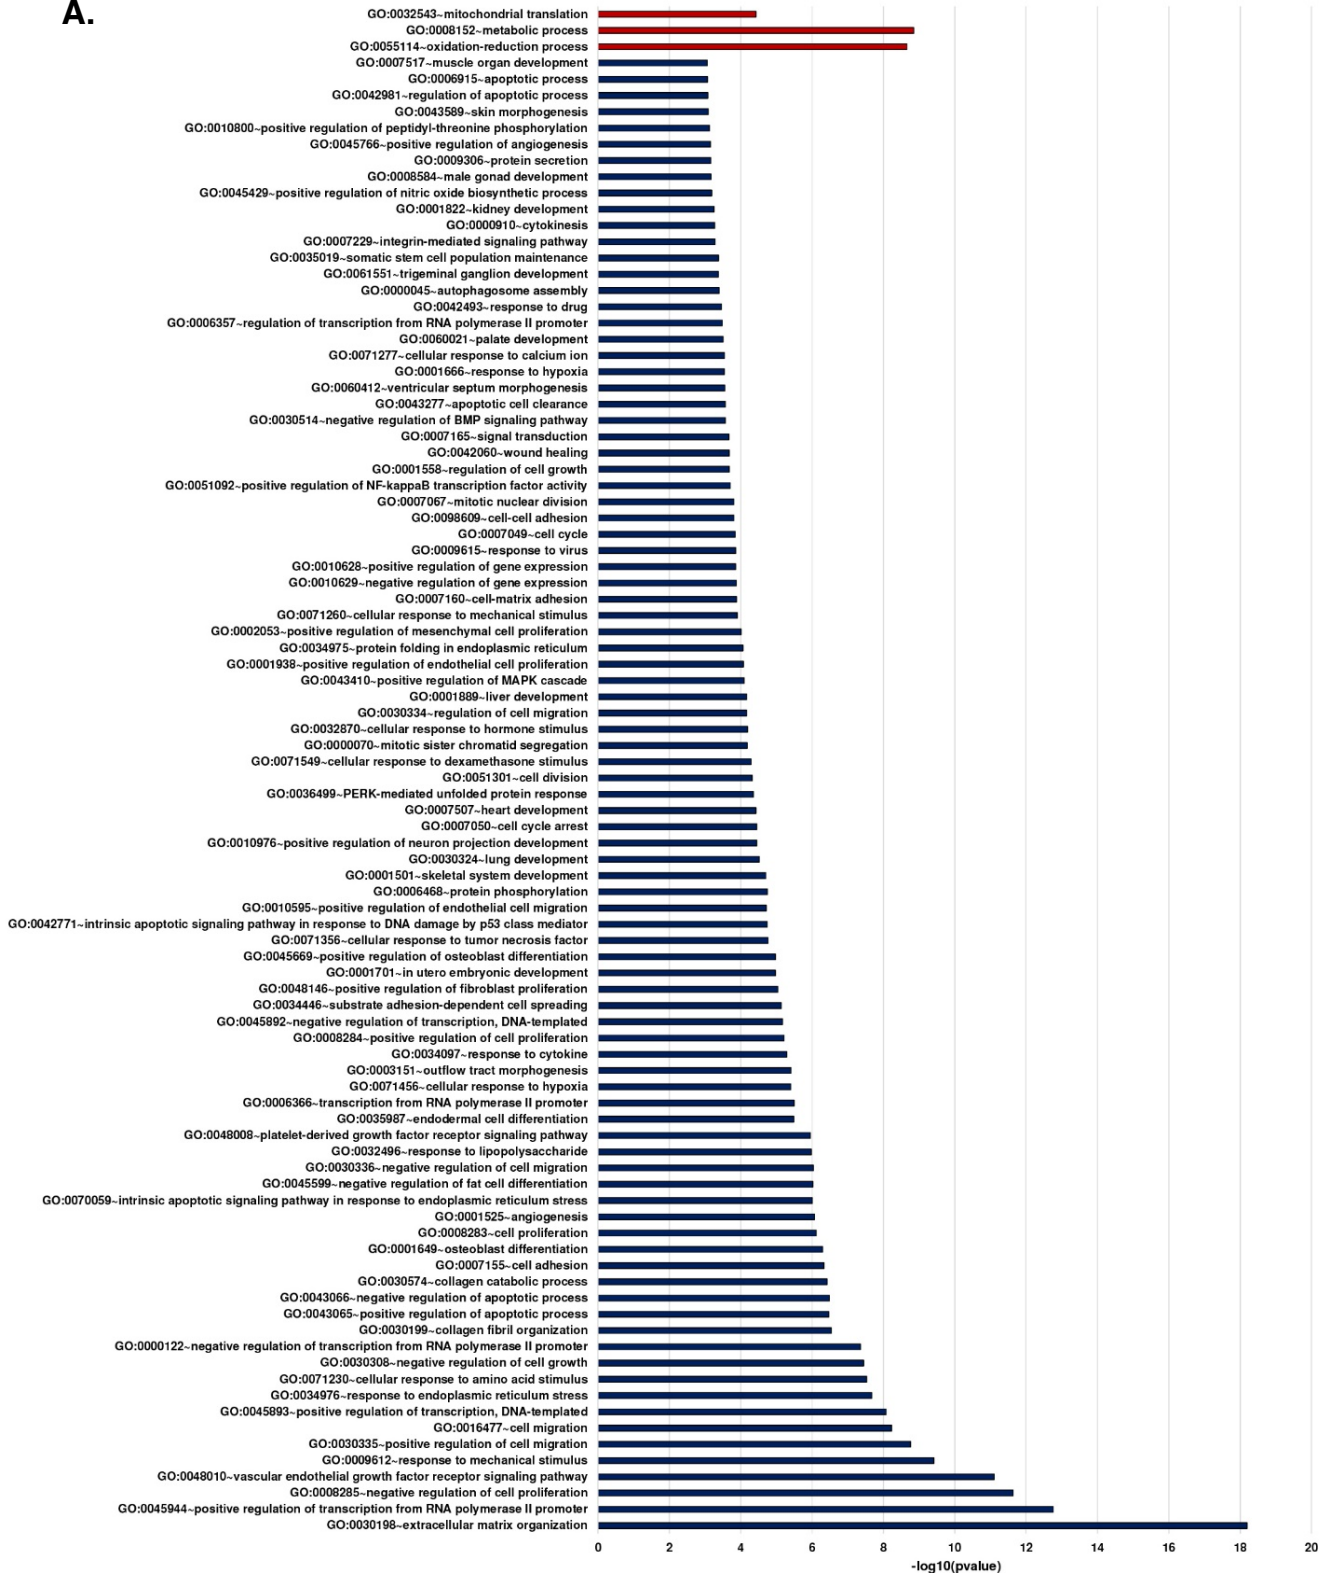

**Figure S9. Pathway analysis of differentially expressed genes in siMETTL14-treated cells.** A. Enriched pathways (GO direct terms) 6 hours post-DNA stimulation were identified via David (REF) using all significantly upregulated (red) or downregulated (blue) gene sets. Only pathways with a Benjamini-Hochberg score  $< 0.05$  are shown. B. As in A except after 12 hours post-DNA stimulation

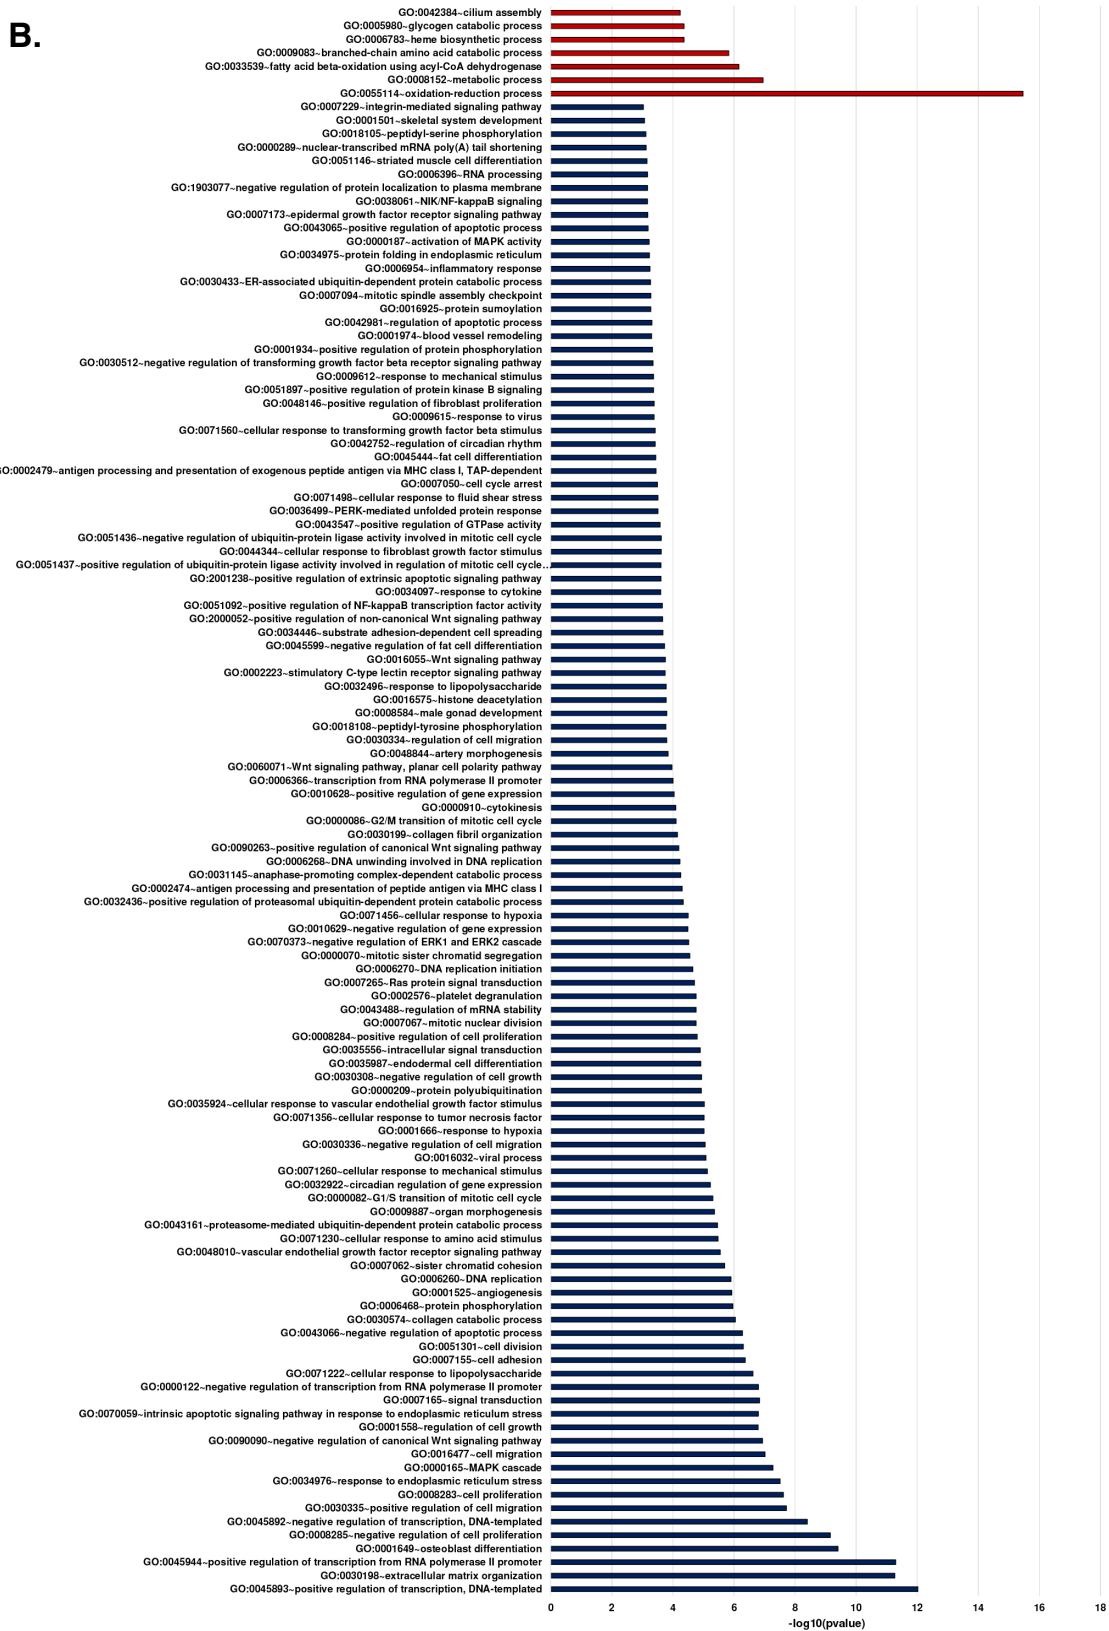

**Figure S9 - cont'd.** Pathway analysis of differentially expressed genes in siMETTL14-treated cells .

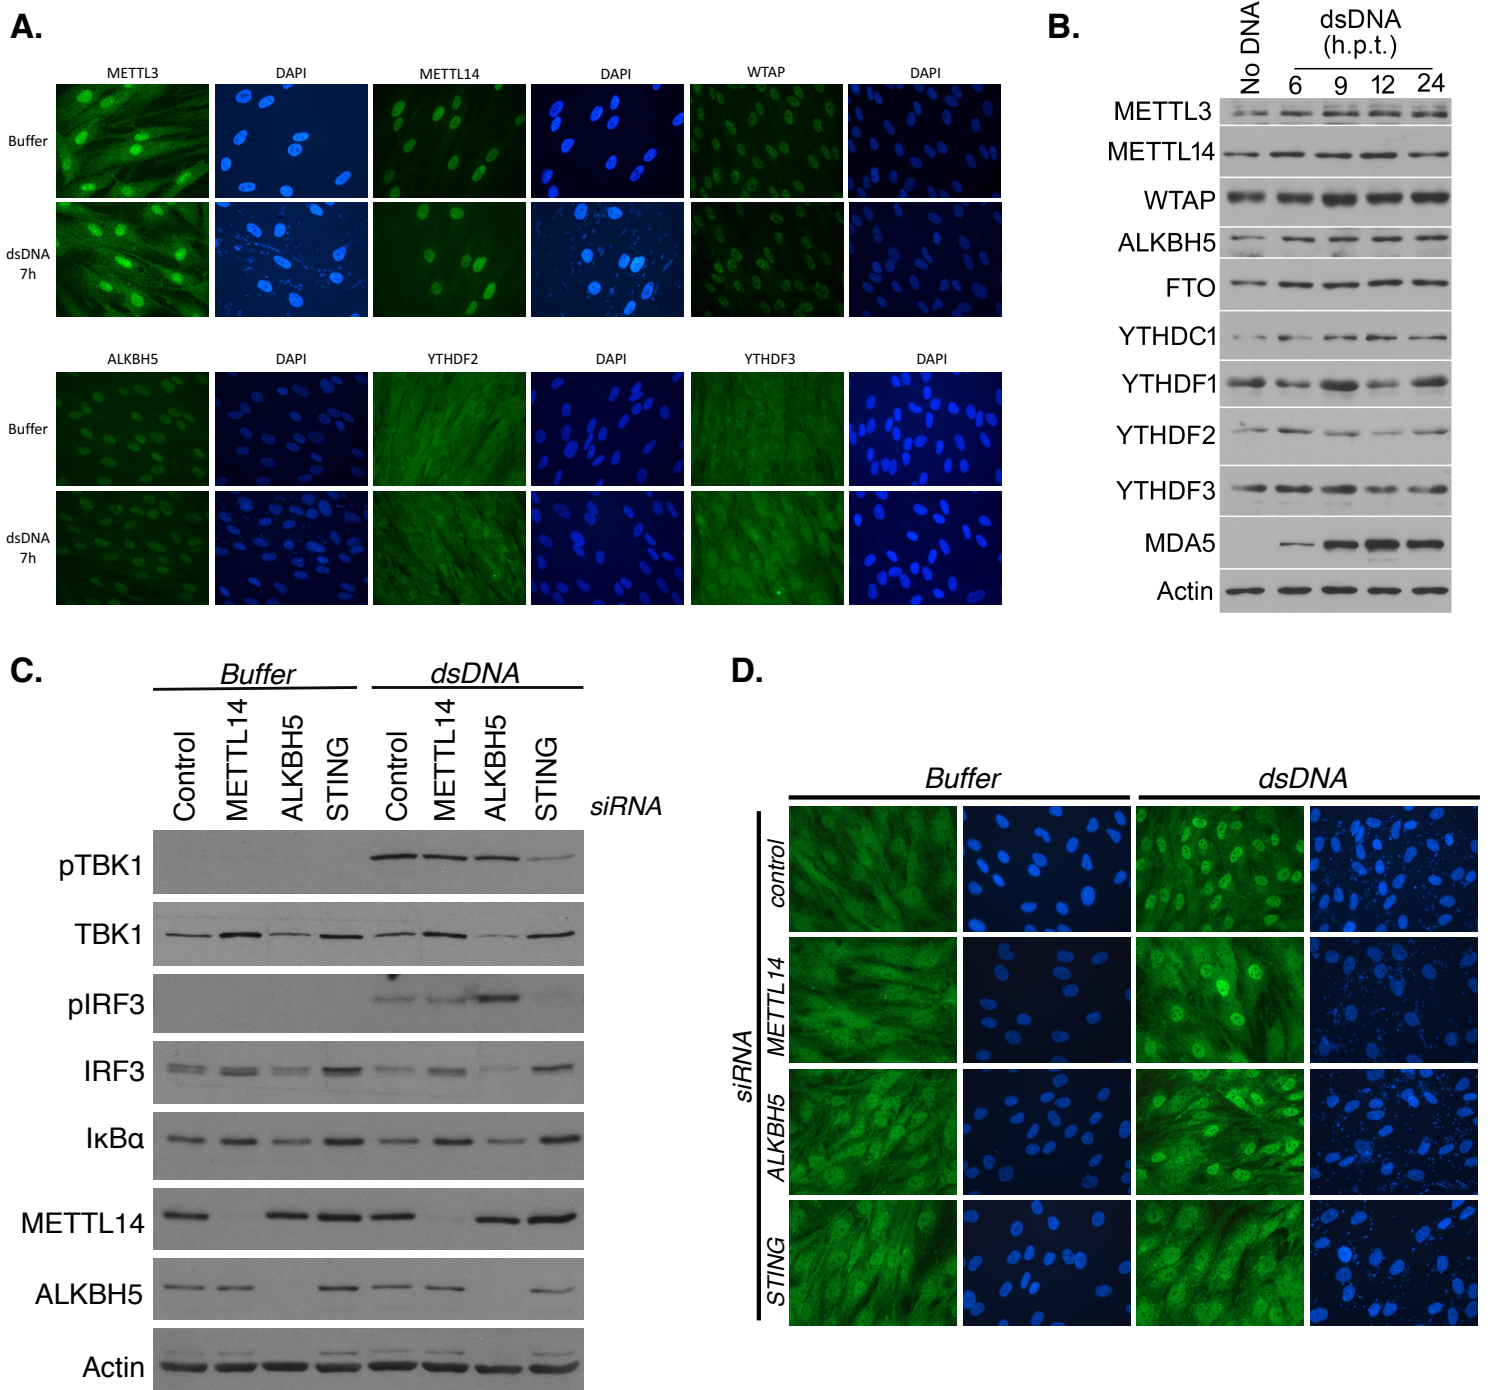

**Figure S10. Response of m<sup>6</sup>A machinery to dsDNA in uninfected cells.** A) NHDFs exposed to buffer or dsDNA for 7h were fixed, permeabilized and stained with DAPI. Subcellular distribution of host m<sup>6</sup>A methylase subunits (*METTL3*, *METTL14*, *WTAP*), the demethylase *ALKBH5*, or m<sup>6</sup>A readers (*YTHDF2*, *YTHDF3*) was visualized by indirect immunofluorescence using the indicated antibodies. B) Total protein isolated from NHDFs exposed to buffer or transfected with dsDNA for the indicated times (h.p.t.= h post-transfection) was fractionated by SDS-PAGE and analyzed by immunoblotting with the indicated antisera. Actin is a loading control; MDA5 is a control showing dsDNA-induced protein accumulation. C) NHDFs were treated with control, non-silencing siRNA, or siRNA specific for the indicated targets (*METTL14*, *ALKBH5*, *STING*). After 72 h, cultures were treated with buffer or dsDNA for 6 h. Total protein was harvested, fractionated by SDS-PAGE and analyzed by immunoblotting with the antibodies indicated on the left. Actin is a loading control. D) As in C except cultures were fixed, permeabilized, and stained with DAPI. Subcellular IRF3 distribution was determined by indirect immunofluorescence using an IRF3-specific antibody.
